# Supplementary material for: Comparison of the effect of Roux‐en‐Y gastric bypass and sleeve gastrectomy on remission of type 2 diabetes: A systematic review and meta‐analysis of randomized controlled trials
Source: PubMed Central journal article supplement — Obes Rev. 2020 Mar 11;21(6):e13011. doi: 10.1111/obr.13011 (PMC7317556; doi:10.1111/obr.13011), 2020-03-11
Supplement: OBR-21-e13011-s002.pdf [file OBR-21-e13011-s002.pdf]

Database(s): **Ovid MEDLINE(R) Epub Ahead of Print, In-Process & Other Non-Indexed Citations, Ovid**

**MEDLINE(R) Daily and Ovid MEDLINE(R)** 1946 to Present

Search Strategy:

| #  | Searches                               |
|----|----------------------------------------|
| 1  | (gastr* adj2 (sleeve* or bypass*)).mp. |
| 2  | randomized controlled trial.pt.        |
| 3  | controlled clinical trial.pt.          |
| 4  | randomi?ed.tw.                         |
| 5  | randomly.tw.                           |
| 6  | or/2-5                                 |
| 7  | exp animals/ not humans/               |
| 8  | 6 not 7                                |
| 9  | 1 and 8                                |
| 10 | limit 9 to english language            |

Database(s): **Embase** 1974 to present

Search Strategy:

| # | Searches                               |
|---|----------------------------------------|
| 1 | (gastr* adj2 (sleeve* or bypass*)).mp. |
| 2 | randomized controlled trial/           |
| 3 | randomi?ed.tw.                         |
| 4 | randomly.tw.                           |
| 5 | or/2-4                                 |
| 6 | Nonhuman/                              |
| 7 | 5 not 6                                |
| 8 | 1 and 7                                |
| 9 | limit 8 to english language            |

Cochrane Library – **CENTRAL**

Search strategy:

|                                      |
|--------------------------------------|
| (gastr* NEAR/2 (sleeve* or bypass*)) |
|--------------------------------------|
